# Supplementary material for: Implementation of collaborative care for depression in VA HIV clinics: Translating Initiatives for Depression into Effective Solutions (HITIDES): protocol for a cluster-randomized type 3 hybrid effectiveness-implementation trial
Source: PubMed Central journal article supplement (PMC11404036; doi:10.1186/s43058-024-00639-z), 2024-09-16
Supplement: 43058_2024_639_MOESM1_ESM.pdf [file 43058_2024_639_MOESM1_ESM.pdf]

**CONSORT 2010 checklist of information to include when reporting a cluster randomised trial**

| Section/topic and item No         | Standard checklist item                                                                                                                                                                     | Extension for cluster designs                                                                                                                                                                                      | Page No* |
|-----------------------------------|---------------------------------------------------------------------------------------------------------------------------------------------------------------------------------------------|--------------------------------------------------------------------------------------------------------------------------------------------------------------------------------------------------------------------|----------|
| <b>Title and abstract</b>         |                                                                                                                                                                                             |                                                                                                                                                                                                                    |          |
| 1a                                | Identification as a randomised trial in the title                                                                                                                                           | Identification as a cluster randomised trial in the title                                                                                                                                                          | 1        |
| 1b                                | Structured summary of trial design, methods, results, and conclusions (for specific guidance see CONSORT for abstracts) <sup>11 12</sup>                                                    | See table 2                                                                                                                                                                                                        | 4        |
| <b>Introduction</b>               |                                                                                                                                                                                             |                                                                                                                                                                                                                    |          |
| Background and objectives:        |                                                                                                                                                                                             |                                                                                                                                                                                                                    |          |
| 2a                                | Scientific background and explanation of rationale                                                                                                                                          | Rationale for using a cluster design                                                                                                                                                                               | 5        |
| 2b                                | Specific objectives or hypotheses                                                                                                                                                           | Whether objectives pertain to the cluster level, the individual participant level, or both                                                                                                                         | 5        |
| <b>Methods</b>                    |                                                                                                                                                                                             |                                                                                                                                                                                                                    |          |
| Trial design:                     |                                                                                                                                                                                             |                                                                                                                                                                                                                    |          |
| 3a                                | Description of trial design (such as parallel, factorial) including allocation ratio                                                                                                        | Definition of cluster and description of how the design features apply to the clusters                                                                                                                             | 5-6      |
| 3b                                | Important changes to methods after trial commencement (such as eligibility criteria), with reasons                                                                                          |                                                                                                                                                                                                                    | N/A      |
| Participants:                     |                                                                                                                                                                                             |                                                                                                                                                                                                                    |          |
| 4a                                | Eligibility criteria for participants                                                                                                                                                       | Eligibility criteria for clusters                                                                                                                                                                                  | 6, 10-11 |
| 4b                                | Settings and locations where the data were collected                                                                                                                                        |                                                                                                                                                                                                                    | 6-7      |
| Interventions:                    |                                                                                                                                                                                             |                                                                                                                                                                                                                    |          |
| 5                                 | The interventions for each group with sufficient details to allow replication, including how and when they were actually administered                                                       | Whether interventions pertain to the cluster level, the individual participant level, or both                                                                                                                      | 6-13     |
| Outcomes:                         |                                                                                                                                                                                             |                                                                                                                                                                                                                    |          |
| 6a                                | Completely defined prespecified primary and secondary outcome measures, including how and when they were assessed                                                                           | Whether outcome measures pertain to the cluster level, the individual participant level, or both                                                                                                                   | 9-13     |
| 6b                                | Any changes to trial outcomes after the trial commenced, with reasons                                                                                                                       |                                                                                                                                                                                                                    | N/A      |
| Sample size:                      |                                                                                                                                                                                             |                                                                                                                                                                                                                    |          |
| 7a                                | How sample size was determined                                                                                                                                                              | Method of calculation, number of clusters(s) (and whether equal or unequal cluster sizes are assumed), cluster size, a coefficient of intracluster correlation (ICC or $k$ ), and an indication of its uncertainty | 7        |
| 7b                                | When applicable, explanation of any interim analyses and stopping guidelines                                                                                                                |                                                                                                                                                                                                                    | N/A      |
| <b>Randomisation</b>              |                                                                                                                                                                                             |                                                                                                                                                                                                                    |          |
| Sequence generation:              |                                                                                                                                                                                             |                                                                                                                                                                                                                    |          |
| 8a                                | Method used to generate the random allocation sequence                                                                                                                                      |                                                                                                                                                                                                                    | 7        |
| 8b                                | Type of randomisation; details of any restriction (such as blocking and block size)                                                                                                         | Details of stratification or matching if used                                                                                                                                                                      | 7        |
| Allocation concealment mechanism: |                                                                                                                                                                                             |                                                                                                                                                                                                                    |          |
| 9                                 | Mechanism used to implement the random allocation sequence (such as sequentially numbered containers), describing any steps taken to conceal the sequence until interventions were assigned | Specification that allocation was based on clusters rather than individuals and whether allocation concealment (if any) was at the cluster level, the individual participant level, or both                        | N/A      |
| Implementation:                   |                                                                                                                                                                                             |                                                                                                                                                                                                                    |          |
| 10                                | Who generated the random allocation sequence, who enrolled participants, and who assigned participants to interventions                                                                     | Replaced by 10a, 10b, and 10c                                                                                                                                                                                      |          |
| 10a                               |                                                                                                                                                                                             | Who generated the random allocation sequence, who enrolled clusters, and who assigned clusters to interventions                                                                                                    | N/A      |

Table 1 (continued)

| Section/topic and item No                             | Standard checklist item                                                                                                                           | Extension for cluster designs                                                                                                                                      | Page No* |
|-------------------------------------------------------|---------------------------------------------------------------------------------------------------------------------------------------------------|--------------------------------------------------------------------------------------------------------------------------------------------------------------------|----------|
| 10b                                                   |                                                                                                                                                   | Mechanism by which individual participants were included in clusters for the purposes of the trial (such as complete enumeration, random sampling)                 | N/A      |
| 10c                                                   |                                                                                                                                                   | From whom consent was sought (representatives of the cluster, or individual cluster members, or both) and whether consent was sought before or after randomisation | N/A      |
| <b>Blinding:</b>                                      |                                                                                                                                                   |                                                                                                                                                                    |          |
| 11a                                                   | If done, who was blinded after assignment to interventions (for example, participants, care providers, those assessing outcomes) and how          |                                                                                                                                                                    | N/A      |
| 11b                                                   | If relevant, description of the similarity of interventions                                                                                       |                                                                                                                                                                    | N/A      |
| <b>Statistical methods:</b>                           |                                                                                                                                                   |                                                                                                                                                                    |          |
| 12a                                                   | Statistical methods used to compare groups for primary and secondary outcomes                                                                     | How clustering was taken into account                                                                                                                              | 9-13     |
| 12b                                                   | Methods for additional analyses, such as subgroup analyses and adjusted analyses                                                                  |                                                                                                                                                                    | 9-13     |
| <b>Results</b>                                        |                                                                                                                                                   |                                                                                                                                                                    |          |
| Participant flow (a diagram is strongly recommended): |                                                                                                                                                   |                                                                                                                                                                    |          |
| 13a                                                   | For each group, the numbers of participants who were randomly assigned, received intended treatment, and were analysed for the primary outcome    | For each group, the numbers of clusters that were randomly assigned, received intended treatment, and were analysed for the primary outcome                        | N/A      |
| 13b                                                   | For each group, losses and exclusions after randomisation, together with reasons                                                                  | For each group, losses and exclusions for both clusters and individual cluster members                                                                             | N/A      |
| <b>Recruitment:</b>                                   |                                                                                                                                                   |                                                                                                                                                                    |          |
| 14a                                                   | Dates defining the periods of recruitment and follow-up                                                                                           |                                                                                                                                                                    | N/A      |
| 14b                                                   | Why the trial ended or was stopped                                                                                                                |                                                                                                                                                                    | N/A      |
| <b>Baseline data:</b>                                 |                                                                                                                                                   |                                                                                                                                                                    |          |
| 15                                                    | A table showing baseline demographic and clinical characteristics for each group                                                                  | Baseline characteristics for the individual and cluster levels as applicable for each group                                                                        | N/A      |
| <b>Numbers analysed:</b>                              |                                                                                                                                                   |                                                                                                                                                                    |          |
| 16                                                    | For each group, number of participants (denominator) included in each analysis and whether the analysis was by original assigned groups           | For each group, number of clusters included in each analysis                                                                                                       | N/A      |
| <b>Outcomes and estimation:</b>                       |                                                                                                                                                   |                                                                                                                                                                    |          |
| 17a                                                   | For each primary and secondary outcome, results for each group, and the estimated effect size and its precision (such as 95% confidence interval) | Results at the individual or cluster level as applicable and a coefficient of intracluster correlation (ICC or $k$ ) for each primary outcome                      | N/A      |
| 17b                                                   | For binary outcomes, presentation of both absolute and relative effect sizes is recommended                                                       |                                                                                                                                                                    | N/A      |
| <b>Ancillary analyses:</b>                            |                                                                                                                                                   |                                                                                                                                                                    |          |
| 18                                                    | Results of any other analyses performed, including subgroup analyses and adjusted analyses, distinguishing prespecified from exploratory          |                                                                                                                                                                    | N/A      |
| <b>Harms:</b>                                         |                                                                                                                                                   |                                                                                                                                                                    |          |
| 19                                                    | All important harms or unintended effects in each group (for specific guidance see CONSORT for harms <sup>106</sup> )                             |                                                                                                                                                                    | N/A      |
| <b>Discussion</b>                                     |                                                                                                                                                   |                                                                                                                                                                    |          |
| <b>Limitations:</b>                                   |                                                                                                                                                   |                                                                                                                                                                    |          |
| 20                                                    | Trial limitations, addressing sources of potential bias, imprecision, and, if relevant, multiplicity of analyses                                  |                                                                                                                                                                    | 13       |
| <b>Generalisability:</b>                              |                                                                                                                                                   |                                                                                                                                                                    |          |
| 21                                                    | Generalisability (external validity, applicability) of the trial findings                                                                         | Generalisability to clusters and/or individual participants (as relevant)                                                                                          | 13       |

Table 1 (continued)

| Section/topic and item No | Standard checklist item                                                                                       | Extension for cluster designs | Page No* |
|---------------------------|---------------------------------------------------------------------------------------------------------------|-------------------------------|----------|
| Interpretation:           |                                                                                                               |                               |          |
| 22                        | Interpretation consistent with results, balancing benefits and harms, and considering other relevant evidence |                               | 13       |
| <b>Other information</b>  |                                                                                                               |                               |          |
| Registration:             |                                                                                                               |                               |          |
| 23                        | Registration number and name of trial registry                                                                |                               | 4        |
| Protocol:                 |                                                                                                               |                               |          |
| 24                        | Where the full trial protocol can be accessed, if available                                                   |                               | N/A      |
| Funding:                  |                                                                                                               |                               |          |
| 25                        | Sources of funding and other support (such as supply of drugs), role of funders                               |                               | 13       |

\*Page numbers optional depending on journal requirements.

**Extension of CONSORT for abstracts 11 12 to reports of cluster randomised trials**

| Item               | Standard checklist item                                                                                     | Extension for cluster trials                                                                             |   |
|--------------------|-------------------------------------------------------------------------------------------------------------|----------------------------------------------------------------------------------------------------------|---|
| Title              | Identification of study as randomised                                                                       | Identification of study as cluster randomised                                                            | X |
| Trial design       | Description of the trial design (for example, parallel, cluster, non-inferiority)                           |                                                                                                          |   |
| Methods:           |                                                                                                             |                                                                                                          |   |
| Participants       | Eligibility criteria for participants and the settings where the data were collected                        | Eligibility criteria for clusters                                                                        | X |
| Interventions      | Interventions intended for each group                                                                       |                                                                                                          |   |
| Objective          | Specific objective or hypothesis                                                                            | Whether objective or hypothesis pertains to the cluster level, the individual participant level, or both | X |
| Outcome            | Clearly defined primary outcome for this report                                                             | Whether the primary outcome pertains to the cluster level, the individual participant level or both      | X |
| Randomisation      | How participants were allocated to interventions                                                            | How clusters were allocated to interventions                                                             |   |
| Blinding (masking) | Whether or not participants, care givers, and those assessing the outcomes were blinded to group assignment |                                                                                                          |   |
| Results:           |                                                                                                             |                                                                                                          |   |
| Numbers randomised | Number of participants randomised to each group                                                             | Number of clusters randomised to each group                                                              |   |
| Recruitment        | Trial status*                                                                                               |                                                                                                          |   |
| Numbers analysed   | Number of participants analysed in each group                                                               | Number of clusters analysed in each group                                                                |   |
| Outcome            | For the primary outcome, a result for each group and the estimated effect size and its precision            | Results at the cluster or individual level as applicable for each primary outcome                        |   |
| Harms              | Important adverse events or side effects                                                                    |                                                                                                          |   |
| Conclusions        | General interpretation of the results                                                                       |                                                                                                          | X |
| Trial registration | Registration number and name of trial register                                                              |                                                                                                          | X |
| Funding            | Source of funding                                                                                           |                                                                                                          | X |

\*Relevant to conference abstracts.
